# Supplementary material
Source: publisher figshare collection journal article supplement (https://gsajournals.figshare.com/articles/dataset/_/13726183)
Supplement: Supplementary file 1 [file 1]

## SUPPLEMENTARY MATERIAL

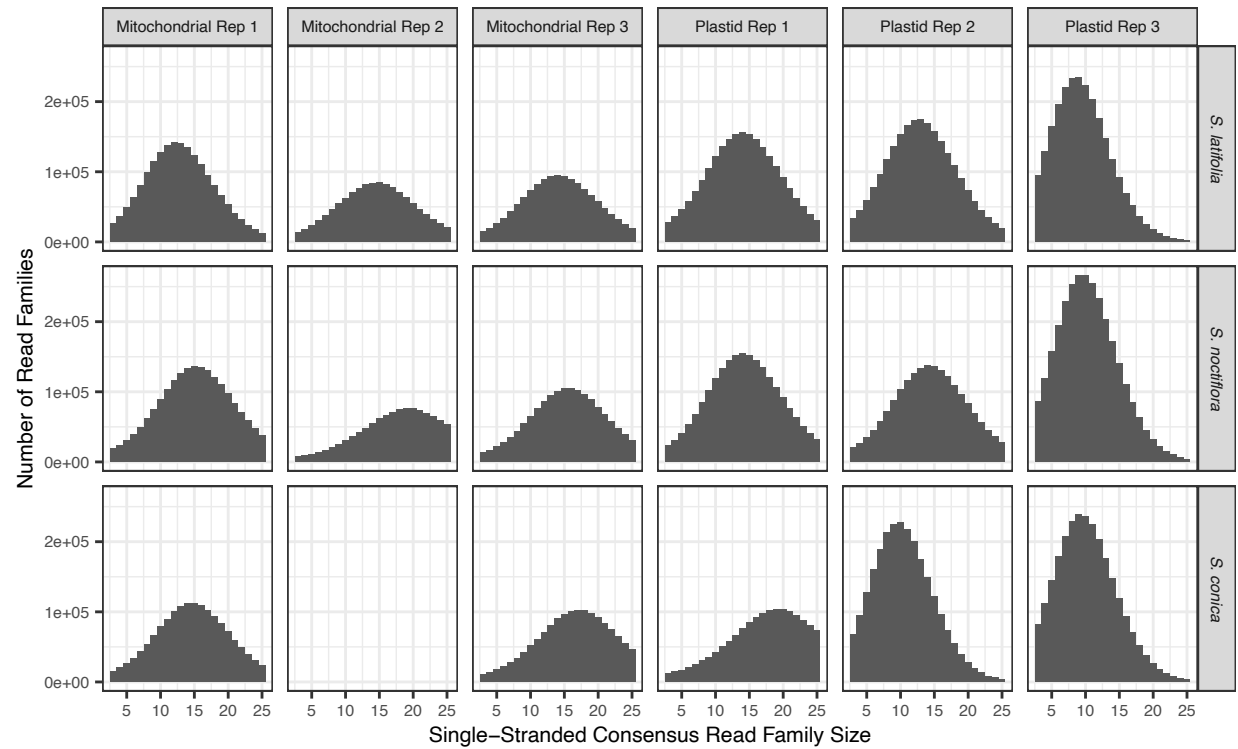

**Figure S1.** Summary of family sizes for single-stranded consensus sequences used for generation of double-stranded consensus sequences for each Duplex Sequencing library. The analysis pipeline required a minimum family size of 3 reads for each of the two complementary single-stranded families. The mitochondrial DNA library for the second biological replicate from *S. conica* was not sequenced because of an apparent library loading error.

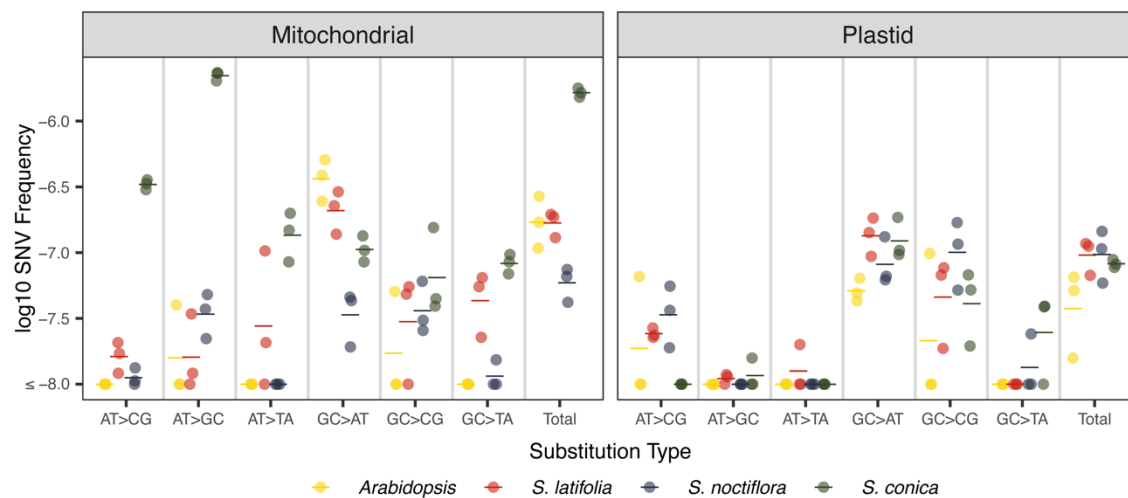

**Figure S2.** Variation in mitochondrial and plastid SNV frequencies and spectra across *Arabidopsis* and *Silene* species. The same data shown in Figure 2 are plotted on a log scale here.

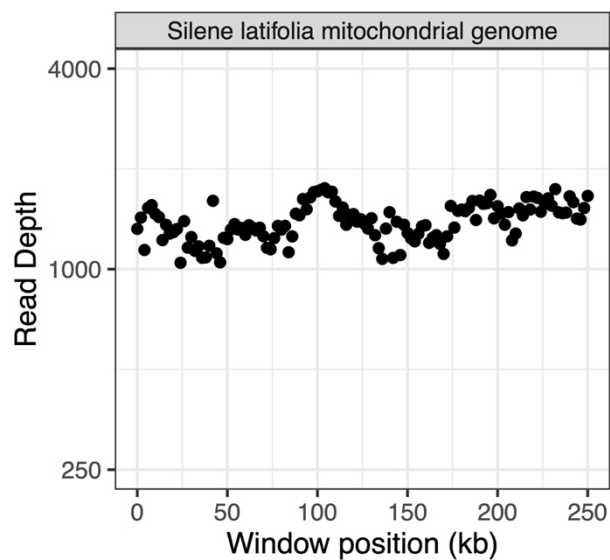

**Figure S3.** Summary of mitochondrial genome coverage in the *S. latifolia* UK2600 total-cellular sequencing library. Coverage is estimated based on reads mapping with a maximum of one mismatch and no indels in 2-kb windows.

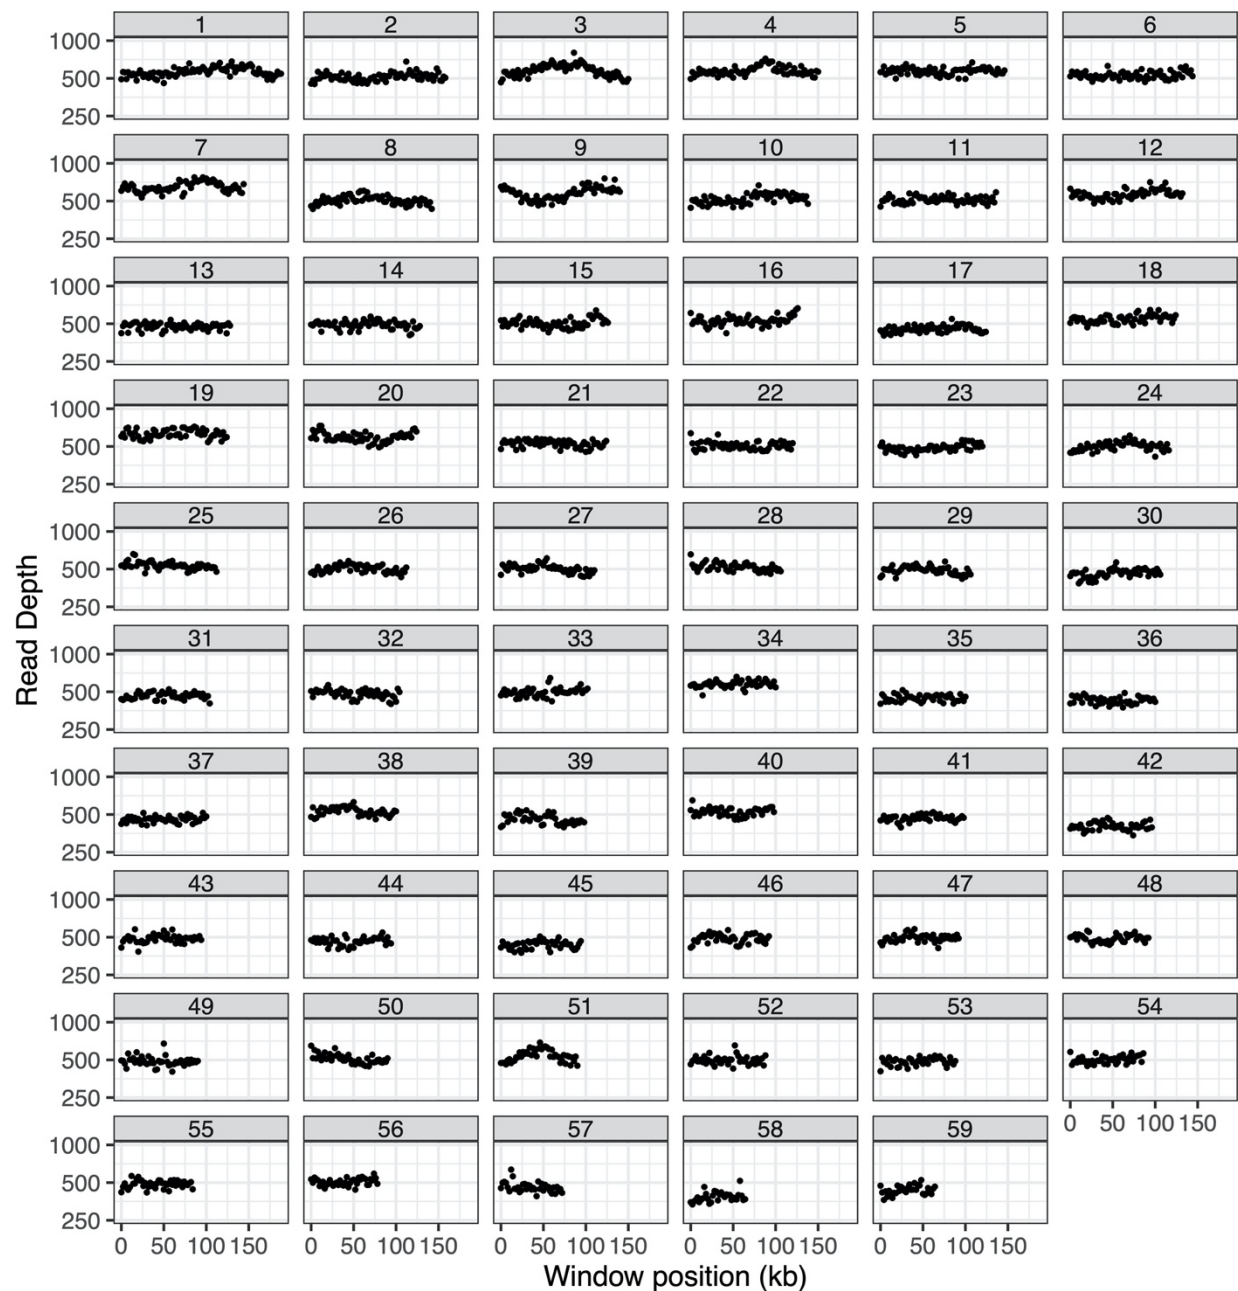

**Figure S4.** Summary of mitochondrial genome coverage in the *S. noctiflora* OSR total-cellular sequencing library. Coverage is estimated based on reads mapping with a maximum of one mismatch and no indels in 2-kb windows. Each panel represents a different chromosome within the multichromosomal genome.

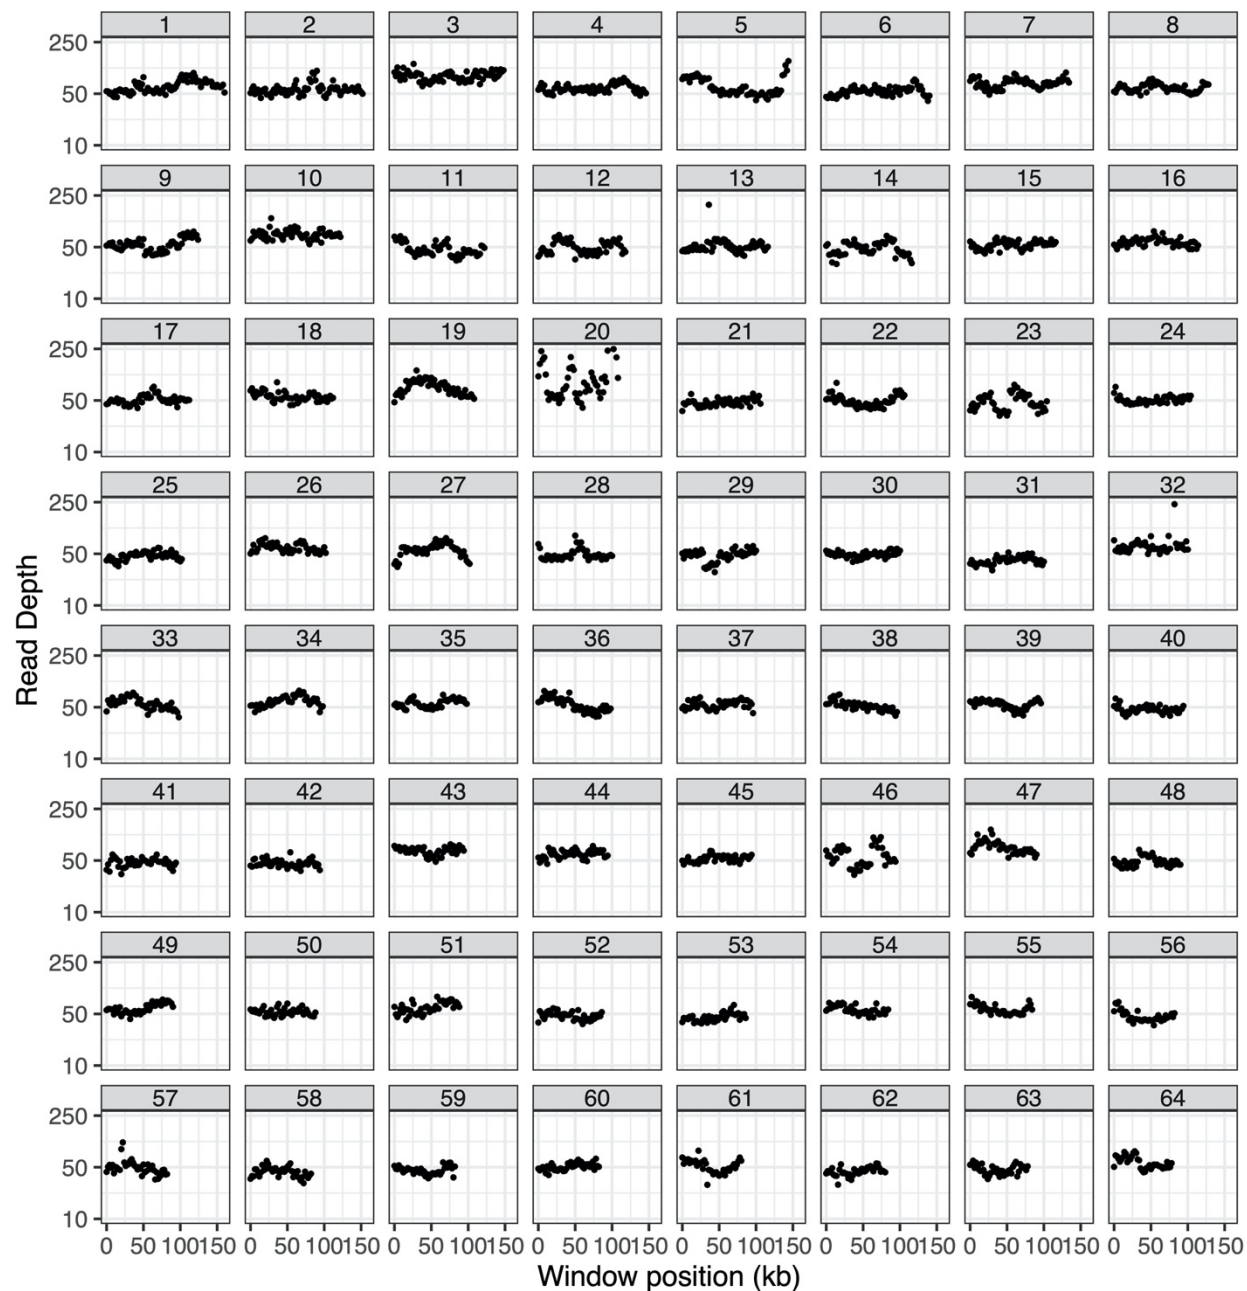

**Figure S5a.** Summary of coverage for mitochondrial chromosomes 1 through 64 in the *S. conica* ABR total-cellular sequencing library. Coverage is estimated based on reads mapping with a maximum of one mismatch and no indels in 2-kb windows. Note that four of the data points on chromosome 20 and two of the data points on chromosome 32 exceeded a coverage of 250 $\times$  and are not shown to improve readability of the plots.

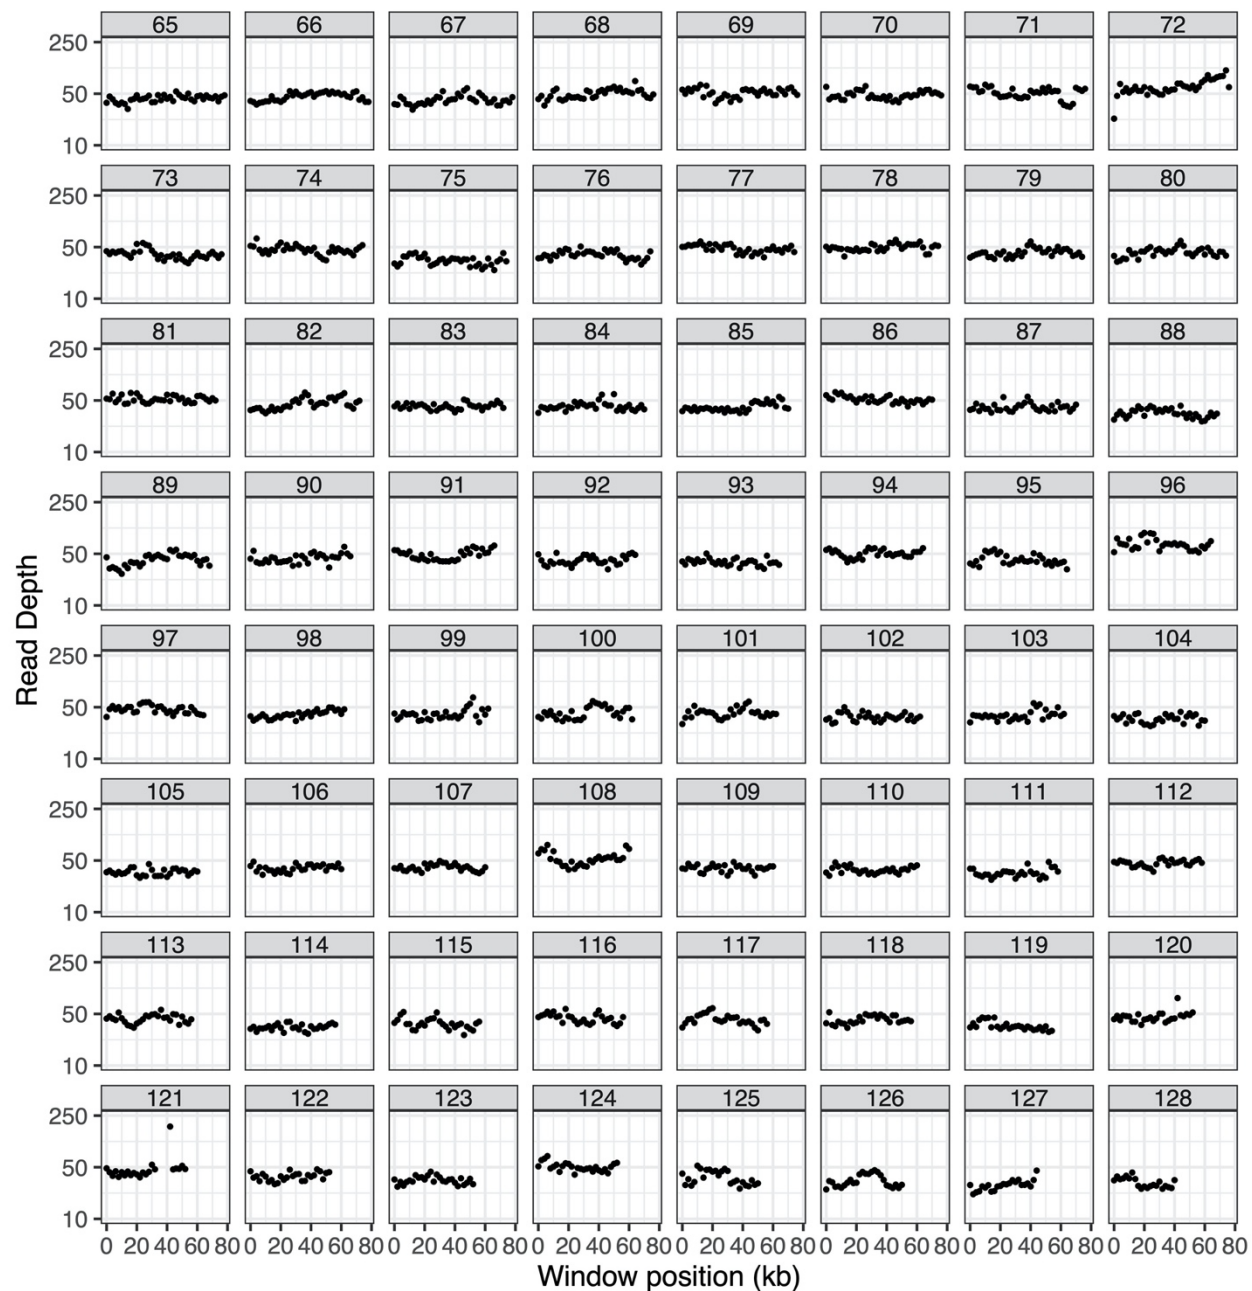

**Figure S5b.** Summary of coverage for mitochondrial chromosomes 65 through 128 in the *S. conica* ABR total-cellular sequencing library. Coverage is estimated based on reads mapping with a maximum of one mismatch and no indels in 2-kb windows. Note that four of the data points on chromosome 121 exceeded a coverage of 250 $\times$  and are not shown to improve readability of the plots.

**Table S1.** Primers used in the *S. conica* ddPCR analysis. The two nuclear markers are referred to by the identifiers for the homologs in *Arabidopsis thaliana*.

| Gene             | Genome        | Forward Primer         | Reverse Primer          |
|------------------|---------------|------------------------|-------------------------|
| <i>nad9</i>      | mitochondrial | CAAGAAGTGGGTCAAAGAATG  | CGAGAATTAAAACGAGTACTCAG |
| <i>matR</i>      | mitochondrial | GATCAGAATGGTACCCGAATC  | CCTTGAAGATTGCTAGGAGTTG  |
| <i>rpoB</i>      | plastid       | CGGGAGATGCAAGAACAAAC   | CTGATCTTCCTCCCAATCTG    |
| <i>petA</i>      | plastid       | CTATCCCATTTTTGCCCAGC   | CCCCTTTCTTGCCGTTAGC     |
| <i>AT1G06040</i> | nuclear       | CCTTTATCTTCTGTGTGGAGG  | GGCTGTGCACTTTGGTTGG     |
| <i>AT1G07630</i> | nuclear       | CAGAAAAAGTGGAATGATGCTC | CAATGAGATGAAGTGCTCTACC  |

**Table S2.** Summary of library sequencing and mapping. Reported coverage values and mapping percentages are for duplex consensus sequences.

| Library                         | Library Type           | SRA Accession | Raw Read Pairs | Mito Coverage (bp) | Plastid Coverage (bp) | Mito Mapping (%) | Plastid Mapping (%) | Unmapped (%) |
|---------------------------------|------------------------|---------------|----------------|--------------------|-----------------------|------------------|---------------------|--------------|
| Silene conica chloroplast 1     | Chloroplast duplex     | SAMN17011097  | 1.15E+08       | 9.25E+07           | 2.03E+08              | 29.49%           | 64.88%              | 5.63%        |
| Silene conica chloroplast 2     | Chloroplast duplex     | SAMN17011098  | 1.15E+08       | 1.33E+08           | 2.72E+08              | 31.48%           | 64.13%              | 4.39%        |
| Silene conica chloroplast 3     | Chloroplast duplex     | SAMN17011099  | 1.42E+08       | 1.37E+08           | 2.70E+08              | 31.72%           | 62.55%              | 5.73%        |
| Silene conica mito 1            | Mitochondrial duplex   | SAMN17011100  | 1.01E+08       | 2.18E+08           | 1.77E+07              | 80.87%           | 6.58%               | 12.55%       |
| Silene conica mito 3            | Mitochondrial duplex   | SAMN17011101  | 1.14E+08       | 2.16E+08           | 2.01E+07              | 77.21%           | 7.16%               | 15.63%       |
| Silene latifolia chloroplast 1  | Chloroplast duplex     | SAMN17011085  | 1.33E+08       | 2.89E+07           | 2.83E+08              | 7.39%            | 72.35%              | 20.26%       |
| Silene latifolia chloroplast 2  | Chloroplast duplex     | SAMN17011086  | 1.28E+08       | 3.54E+07           | 2.41E+08              | 8.82%            | 60.10%              | 31.08%       |
| Silene latifolia chloroplast 3  | Chloroplast duplex     | SAMN17011087  | 1.01E+08       | 3.68E+07           | 2.73E+08              | 9.13%            | 67.73%              | 23.14%       |
| Silene latifolia mito 1         | Mitochondrial duplex   | SAMN17011088  | 1.13E+08       | 1.16E+08           | 2.67E+07              | 38.26%           | 8.83%               | 52.91%       |
| Silene latifolia mito 2         | Mitochondrial duplex   | SAMN17011089  | 9.79E+07       | 4.93E+07           | 1.63E+07              | 24.87%           | 8.21%               | 66.92%       |
| Silene latifolia mito 3         | Mitochondrial duplex   | SAMN17011090  | 8.83E+07       | 6.56E+07           | 2.23E+07              | 27.94%           | 9.48%               | 62.58%       |
| Silene noctiflora chloroplast 1 | Chloroplast duplex     | SAMN17011091  | 1.37E+08       | 1.06E+08           | 2.55E+08              | 27.63%           | 66.35%              | 6.02%        |
| Silene noctiflora chloroplast 2 | Chloroplast duplex     | SAMN17011092  | 1.25E+08       | 9.39E+07           | 2.20E+08              | 28.18%           | 66.12%              | 5.70%        |
| Silene noctiflora chloroplast 3 | Chloroplast duplex     | SAMN17011093  | 1.37E+08       | 1.25E+08           | 3.19E+08              | 25.69%           | 65.36%              | 8.95%        |
| Silene noctiflora mito 1        | Mitochondrial duplex   | SAMN17011094  | 1.32E+08       | 2.76E+08           | 1.56E+07              | 83.03%           | 4.68%               | 12.29%       |
| Silene noctiflora mito 2        | Mitochondrial duplex   | SAMN17011095  | 1.06E+08       | 1.88E+08           | 1.22E+07              | 81.54%           | 5.28%               | 13.18%       |
| Silene noctiflora mito 3        | Mitochondrial duplex   | SAMN17011096  | 1.03E+08       | 1.93E+08           | 2.39E+07              | 71.53%           | 8.84%               | 19.63%       |
| Silene conica ABR               | Total cellular shotgun | SAMN17011105  | 4.98E+08       | 3.53E+08           | 1.68E+09              | 0.49%            | 2.31%               | 97.20%       |
| Silene noctiflora OSR           | Total cellular shotgun | SAMN17011104  | 5.76E+08       | 3.45E+09           | 2.10E+09              | 2.51%            | 1.53%               | 95.96%       |
| Silene latifolia UK2600         | Total cellular shotgun | SAMN17011102  | 2.81E+08       | 5.95E+08           | 5.51E+09              | 0.50%            | 4.64%               | 94.86%       |
| Silene latifolia Kew 32982      | Total cellular shotgun | SAMN17011103  | 3.04E+08       |                    |                       |                  |                     |              |



**Table S3.** *Silene* mitochondrial SNV count and frequency data with and without *k*-mer filtering

| Species                  | Rep | k-mer Filt | SNV Counts |     |     |     |     |     |       | SNV Frequencies |         |         |         |         |         |         |
|--------------------------|-----|------------|------------|-----|-----|-----|-----|-----|-------|-----------------|---------|---------|---------|---------|---------|---------|
|                          |     |            | A>C        | A>G | A>T | C>A | C>G | C>T | Total | A>C             | A>G     | A>T     | C>A     | C>G     | C>T     | Total   |
| <i>Silene conica</i>     | 1   | 10         | 53         | 356 | 26  | 13  | 6   | 18  | 472   | 3.0E-07         | 2.0E-06 | 1.5E-07 | 9.7E-08 | 4.5E-08 | 1.3E-07 | 1.5E-06 |
| <i>Silene conica</i>     | 2   | 10         | 27         | 176 | 15  | 4   | 9   | 6   | 237   | 3.6E-07         | 2.3E-06 | 2.0E-07 | 6.9E-08 | 1.6E-07 | 1.0E-07 | 1.8E-06 |
| <i>Silene conica</i>     | 3   | 10         | 67         | 462 | 17  | 13  | 6   | 13  | 578   | 3.3E-07         | 2.3E-06 | 8.5E-08 | 8.5E-08 | 3.9E-08 | 8.5E-08 | 1.6E-06 |
| <i>Silene conica</i>     | 1   | None       | 150        | 483 | 58  | 49  | 12  | 217 | 969   | 8.5E-07         | 2.7E-06 | 3.3E-07 | 3.6E-07 | 8.9E-08 | 1.6E-06 | 3.1E-06 |
| <i>Silene conica</i>     | 2   | None       | 64         | 238 | 24  | 20  | 12  | 98  | 456   | 8.5E-07         | 3.2E-06 | 3.2E-07 | 3.5E-07 | 2.1E-07 | 1.7E-06 | 3.4E-06 |
| <i>Silene conica</i>     | 3   | None       | 158        | 610 | 50  | 59  | 17  | 231 | 1125  | 7.9E-07         | 3.0E-06 | 2.5E-07 | 3.9E-07 | 1.1E-07 | 1.5E-06 | 3.2E-06 |
| <i>Silene latifolia</i>  | 1   | 10         | 1          | 1   | 0   | 4   | 3   | 18  | 27    | 5.7E-09         | 5.7E-09 | 0.0E+00 | 3.0E-08 | 2.2E-08 | 1.3E-07 | 8.7E-08 |
| <i>Silene latifolia</i>  | 2   | 10         | 1          | 0   | 1   | 2   | 2   | 5   | 11    | 1.3E-08         | 0.0E+00 | 1.3E-08 | 3.5E-08 | 3.5E-08 | 8.6E-08 | 8.2E-08 |
| <i>Silene latifolia</i>  | 3   | 10         | 1          | 2   | 6   | 1   | 0   | 10  | 20    | 5.0E-09         | 1.0E-08 | 3.0E-08 | 6.5E-09 | 0.0E+00 | 6.5E-08 | 5.7E-08 |
| <i>Silene latifolia</i>  | 1   | None       | 9          | 8   | 6   | 17  | 5   | 42  | 87    | 1.1E-07         | 9.7E-08 | 7.3E-08 | 2.7E-07 | 8.1E-08 | 6.8E-07 | 6.0E-07 |
| <i>Silene latifolia</i>  | 2   | None       | 5          | 8   | 14  | 17  | 6   | 58  | 108   | 1.0E-07         | 1.7E-07 | 2.9E-07 | 4.7E-07 | 1.7E-07 | 1.6E-06 | 1.3E-06 |
| <i>Silene latifolia</i>  | 3   | None       | 9          | 16  | 18  | 19  | 10  | 52  | 124   | 1.5E-07         | 2.7E-07 | 3.1E-07 | 4.3E-07 | 2.3E-07 | 1.2E-06 | 1.2E-06 |
| <i>Silene noctiflora</i> | 1   | 10         | 3          | 5   | 1   | 0   | 4   | 3   | 16    | 1.3E-08         | 2.2E-08 | 4.4E-09 | 0.0E+00 | 2.6E-08 | 1.9E-08 | 4.2E-08 |
| <i>Silene noctiflora</i> | 2   | 10         | 1          | 8   | 0   | 0   | 7   | 5   | 21    | 6.0E-09         | 4.8E-08 | 0.0E+00 | 0.0E+00 | 6.1E-08 | 4.3E-08 | 7.4E-08 |
| <i>Silene noctiflora</i> | 3   | 10         | 2          | 7   | 0   | 2   | 4   | 6   | 21    | 1.1E-08         | 3.7E-08 | 0.0E+00 | 1.5E-08 | 3.1E-08 | 4.6E-08 | 6.6E-08 |
| <i>Silene noctiflora</i> | 1   | None       | 3          | 8   | 3   | 4   | 6   | 12  | 36    | 1.3E-08         | 3.5E-08 | 1.3E-08 | 2.6E-08 | 3.8E-08 | 7.7E-08 | 9.4E-08 |
| <i>Silene noctiflora</i> | 2   | None       | 2          | 11  | 1   | 2   | 13  | 9   | 38    | 1.2E-08         | 6.6E-08 | 6.0E-09 | 1.7E-08 | 1.1E-07 | 7.8E-08 | 1.3E-07 |
| <i>Silene noctiflora</i> | 3   | None       | 5          | 13  | 2   | 11  | 9   | 11  | 51    | 2.7E-08         | 6.9E-08 | 1.1E-08 | 8.4E-08 | 6.9E-08 | 8.4E-08 | 1.6E-07 |

**Table S4.** *Silene* plastid SNV count and frequency data with and without *k*-mer filtering

| Species                  | Rep | k-mer Filt | SNV Counts |     |     |     |     |     |       | SNV Frequencies |         |         |         |         |         |         |
|--------------------------|-----|------------|------------|-----|-----|-----|-----|-----|-------|-----------------|---------|---------|---------|---------|---------|---------|
|                          |     |            | A>C        | A>G | A>T | C>A | C>G | C>T | Total | A>C             | A>G     | A>T     | C>A     | C>G     | C>T     | Total   |
| <i>Silene conica</i>     | 1   | 10         | 0          | 2   | 1   | 3   | 4   | 8   | 18    | 0.0E+00         | 1.6E-08 | 7.9E-09 | 3.9E-08 | 5.2E-08 | 1.0E-07 | 8.8E-08 |
| <i>Silene conica</i>     | 2   | 10         | 0          | 0   | 0   | 4   | 7   | 10  | 21    | 0.0E+00         | 0.0E+00 | 0.0E+00 | 3.9E-08 | 6.8E-08 | 9.7E-08 | 7.7E-08 |
| <i>Silene conica</i>     | 3   | 10         | 0          | 1   | 0   | 0   | 2   | 19  | 22    | 0.0E+00         | 6.0E-09 | 0.0E+00 | 0.0E+00 | 2.0E-08 | 1.9E-07 | 8.2E-08 |
| <i>Silene conica</i>     | 1   | None       | 1          | 4   | 1   | 3   | 4   | 12  | 25    | 7.9E-09         | 3.2E-08 | 7.9E-09 | 3.9E-08 | 5.2E-08 | 1.6E-07 | 1.2E-07 |
| <i>Silene conica</i>     | 2   | None       | 0          | 0   | 0   | 6   | 8   | 20  | 34    | 0.0E+00         | 0.0E+00 | 0.0E+00 | 5.8E-08 | 7.7E-08 | 1.9E-07 | 1.3E-07 |
| <i>Silene conica</i>     | 3   | None       | 0          | 1   | 1   | 2   | 4   | 26  | 34    | 0.0E+00         | 6.0E-09 | 6.0E-09 | 2.0E-08 | 3.9E-08 | 2.5E-07 | 1.3E-07 |
| <i>Silene latifolia</i>  | 1   | 10         | 4          | 2   | 0   | 1   | 2   | 10  | 19    | 2.3E-08         | 1.1E-08 | 0.0E+00 | 9.4E-09 | 1.9E-08 | 9.4E-08 | 6.7E-08 |
| <i>Silene latifolia</i>  | 2   | 10         | 4          | 0   | 3   | 0   | 7   | 13  | 27    | 2.7E-08         | 0.0E+00 | 2.0E-08 | 0.0E+00 | 7.7E-08 | 1.4E-07 | 1.1E-07 |
| <i>Silene latifolia</i>  | 3   | 10         | 4          | 2   | 0   | 0   | 7   | 19  | 32    | 2.4E-08         | 1.2E-08 | 0.0E+00 | 0.0E+00 | 6.7E-08 | 1.8E-07 | 1.2E-07 |
| <i>Silene latifolia</i>  | 1   | None       | 8          | 6   | 4   | 2   | 3   | 31  | 54    | 4.5E-08         | 3.4E-08 | 2.3E-08 | 1.9E-08 | 2.8E-08 | 2.9E-07 | 1.9E-07 |
| <i>Silene latifolia</i>  | 2   | None       | 10         | 4   | 11  | 10  | 10  | 38  | 83    | 6.7E-08         | 2.7E-08 | 7.3E-08 | 1.1E-07 | 1.1E-07 | 4.2E-07 | 3.4E-07 |
| <i>Silene latifolia</i>  | 3   | None       | 7          | 12  | 6   | 6   | 9   | 30  | 70    | 4.1E-08         | 7.1E-08 | 3.5E-08 | 5.8E-08 | 8.7E-08 | 2.9E-07 | 2.6E-07 |
| <i>Silene noctiflora</i> | 1   | 10         | 3          | 0   | 1   | 0   | 5   | 6   | 15    | 1.9E-08         | 0.0E+00 | 6.3E-09 | 0.0E+00 | 5.2E-08 | 6.2E-08 | 5.9E-08 |
| <i>Silene noctiflora</i> | 2   | 10         | 5          | 0   | 0   | 2   | 14  | 11  | 32    | 3.6E-08         | 0.0E+00 | 0.0E+00 | 2.4E-08 | 1.7E-07 | 1.3E-07 | 1.5E-07 |
| <i>Silene noctiflora</i> | 3   | 10         | 11         | 0   | 1   | 0   | 14  | 8   | 34    | 5.6E-08         | 0.0E+00 | 5.1E-09 | 0.0E+00 | 1.2E-07 | 6.6E-08 | 1.1E-07 |
| <i>Silene noctiflora</i> | 1   | None       | 5          | 1   | 1   | 1   | 5   | 9   | 22    | 3.1E-08         | 6.3E-09 | 6.3E-09 | 1.0E-08 | 5.2E-08 | 9.3E-08 | 8.6E-08 |
| <i>Silene noctiflora</i> | 2   | None       | 6          | 1   | 0   | 2   | 14  | 19  | 42    | 4.4E-08         | 7.3E-09 | 0.0E+00 | 2.4E-08 | 1.7E-07 | 2.3E-07 | 1.9E-07 |
| <i>Silene noctiflora</i> | 3   | None       | 12         | 0   | 2   | 2   | 14  | 17  | 47    | 6.1E-08         | 0.0E+00 | 1.0E-08 | 1.7E-08 | 1.2E-07 | 1.4E-07 | 1.5E-07 |

**Table S5.** Genome copy number estimates

| Species                  | Nuclear<br>(=Unmapped)<br>Coverage (bp) | Mito<br>Coverage<br>(bp) | Plastid<br>Coverage<br>(bp) | Nuclear<br>Genome<br>Size (bp) | Mito<br>Genome<br>Size (bp) | Plastid<br>Genome<br>Size (bp) | Nuclear<br>Cov. | Mito<br>Cov. | Plastid<br>Cov. | Mito<br>per<br>Nuclear | Plastid<br>per<br>Nuclear |
|--------------------------|-----------------------------------------|--------------------------|-----------------------------|--------------------------------|-----------------------------|--------------------------------|-----------------|--------------|-----------------|------------------------|---------------------------|
| <i>Silene latifolia</i>  | 7.58E+10                                | 3.53E+08                 | 1.68E+09                    | 2.67E+09                       | 2.53E+05                    | 1.52E+05                       | 29.22           | 1394.70      | 11047.66        | 47.72                  | 378.02                    |
| <i>Silene noctiflora</i> | 1.41E+11                                | 3.45E+09                 | 2.10E+09                    | 2.78E+09                       | 6.73E+06                    | 1.52E+05                       | 52.70           | 512.25       | 13838.01        | 9.72                   | 262.59                    |
| <i>Silene conica</i>     | 1.20E+11                                | 5.95E+08                 | 5.51E+09                    | 9.30E+08                       | 1.13E+07                    | 1.47E+05                       | 136.49          | 52.55        | 37486.69        | 0.38                   | 274.64                    |

**Table S6.** ddPCR droplet counts and copy number calculations

| Sample   | Genome  | Marker    | Positive droplets | Negative droplets | Copies per reaction | Dilution Factor | Copies per nuclear copy |
|----------|---------|-----------|-------------------|-------------------|---------------------|-----------------|-------------------------|
| New1     | Mito    | matR      | 1244              | 6955              | 3967                | 1               | 0.98                    |
| New2     | Mito    | matR      | 2413              | 10431             | 4900                | 1               | 1.09                    |
| New3     | Mito    | matR      | 1987              | 11250             | 3820                | 1               | 0.91                    |
| Original | Mito    | matR      | 2356              | 13893             | 3680                | 1               | 0.42                    |
| New1     | Mito    | nad9      | 1842              | 10249             | 3880                | 1               | 0.96                    |
| New2     | Mito    | nad9      | 1202              | 4781              | 5280                | 1               | 1.18                    |
| New3     | Mito    | nad9      | 990               | 5106              | 4160                | 1               | 1.00                    |
| Original | Mito    | nad9      | 2268              | 13951             | 3540                | 1               | 0.41                    |
| New1     | Plastid | petA      | 6502              | 7514              | 14660               | 200             | 727.54                  |
| New2     | Plastid | petA      | 6692              | 6199              | 17220               | 200             | 767.04                  |
| New3     | Plastid | petA      | 6392              | 8264              | 13480               | 200             | 644.98                  |
| Original | Plastid | petA      | 5601              | 1651              | 34820               | 200             | 804.16                  |
| New1     | Plastid | rpoB      | 5868              | 6456              | 15220               | 200             | 755.33                  |
| New2     | Plastid | rpoB      | 6803              | 6015              | 17800               | 200             | 792.87                  |
| New3     | Plastid | rpoB      | 6409              | 8078              | 13740               | 200             | 657.42                  |
| Original | Plastid | rpoB      | 10798             | 4448              | 28980               | 200             | 669.28                  |
| New1     | Nuclear | AT1G06040 | 1524              | 7912              | 4140                | 1               |                         |
| New2     | Nuclear | AT1G06040 | 1751              | 8889              | 4240                | 1               |                         |
| New3     | Nuclear | AT1G06040 | 2070              | 10630             | 4180                | 1               |                         |
| Original | Nuclear | AT1G06040 | 3982              | 10165             | 7780                | 1               |                         |
| New1     | Nuclear | AT1G07630 | 1756              | 9820              | 3920                | 1               |                         |
| New2     | Nuclear | AT1G07630 | 2242              | 10039             | 4740                | 1               |                         |
| New3     | Nuclear | AT1G07630 | 2118              | 10890             | 4180                | 1               |                         |
| Original | Nuclear | AT1G07630 | 5315              | 10629             | 9540                | 1               |                         |

**Table S7.** Detection of mitochondrial SNVs in multiple biological replicates

| Species                  | SNV Detection             | A>C | A>G | A>T | C>A | C>G | C>T | Total |
|--------------------------|---------------------------|-----|-----|-----|-----|-----|-----|-------|
| <i>Silene conica</i>     | Shared among replicates   | 17  | 100 | 5   | 3   | 1   | 2   | 128   |
| <i>Silene conica</i>     | Unique to one replicate   | 32  | 157 | 28  | 19  | 19  | 21  | 276   |
| <i>Silene latifolia</i>  | Shared among replicates** | 0   | 0   | 0   | 0   | 0   | 0   | 0     |
| <i>Silene latifolia</i>  | Unique to one replicate   | 3   | 3   | 7   | 7   | 5   | 33  | 58    |
| <i>Silene noctiflora</i> | Shared among replicates   | 0   | 0   | 0   | 0   | 0   | 0   | 0     |
| <i>Silene noctiflora</i> | Unique to one replicate   | 6   | 20  | 1   | 2   | 15  | 14  | 58    |

\*\*The use of parentals for *k*-mer filtering may have biased against detection of shared SNVs in *S. latifolia* (see main text).
